# Supplementary material for: A machine-vision approach for automated pain measurement at millisecond timescales
Source: eLife journal article supplement (doi:10.7554/elife.57258), 2020-08-06
Supplement: supp [file elife-57258-supp-v1.zip]

Archive with 10 entries (10 files):
- elife_poa_e57258_Figure_2_video_1.mov
- elife_poa_e57258_Figure_4_source_data_1.xlsx
- elife_poa_e57258_Figure_4_source_data_2.xlsx
- elife_poa_e57258_Figure_7_source_data_1.xlsx
- elife_poa_e57258_Transparent_Reporting_File.docx
- elife_poa_e57258_Figure_4_figure_supplement_1.pdf
- elife_poa_e57258_Figure_4_figure_supplement_2.pdf
- elife_poa_e57258_Figure_4_figure_supplement_3.pdf
- elife_poa_e57258_Figure_5_figure_supplement_1.pdf
- elife_poa_e57258_Figure_7_figure_supplement_1.pdf
