# Supplementary material for: A machine-vision approach for automated pain measurement at millisecond timescales
Source: eLife journal article supplement (doi:10.7554/elife.57258), 2020-08-06
Supplement: supp [file elife-57258-supp-v1.zip › elife_poa_e57258_Figure_4_source_data_2.xlsx]

## Sheet: all results
trial	id	strain	stimulus	reflexive.max.height	reflexive.max.x.velocity	reflexive.max.y.velocity	reflexive.distance.traveled	affective.max.height	affective.max.x.velocity	affective.max.y.velocity	affective.distance.traveled	affective.number.of.shakes	affective.shaking.duration	affective.guarding.duration	global.max.height	global.max.x.velocity	global.max.y.velocity	global.distance.traveled	global.number.of.shakes	global.shaking.duration	global.guarding.duration
trial1	921	129	CS	4.41931	414.91	328.473	4.42091	5.16951	653.296	978.312	30.3491	4	0.02	0.116	5.1618	653.296	978.312	34.77	4	0.02	0.116
trial1	921	129	DB	5.09611	669.533	819.888	8.72783	5.13771	518.493	541.54	7.41631	0	0	0.025	5.09611	669.533	819.888	16.1441	0	0	0.025
trial1	921	129	LP	10.5258	601.959	788.8	13.5983	10.4585	249.013	510.789	13.19	0	0	0.057	10.5258	601.959	788.8	26.7883	0	0	0.057
trial1	922	129	CS	3.75499	320.313	323.968	4.22341	3.73666	286.602	376.612	4.17978	0	0	0.0225	3.75499	320.313	376.612	8.40319	0	0	0.0225
trial1	922	129	DB	5.07836	710.686	1302.96	6.68622	4.9736	768.046	856.553	7.70706	0	0	0.02	5.07836	768.046	1302.96	14.3933	0	0	0.02
trial1	922	129	HP	4.152	612.494	311.638	22.8997	10.8629	581.537	797.803	48.6161	2	0.014	0.159	10.8542	612.494	797.803	71.5159	2	0.014	0.159
trial1	922	129	LP	15.4618	825.101	1210.34	18.1178	15.4504	332.168	1353.45	28.1557	0	0	0.0715	15.4618	825.101	1353.45	46.2735	0	0	0.0715
trial1	923	129	CS	2.95564	342.971	437.714	4.85166	2.94767	287.048	450.914	4.94202	0	0	0.03	2.95564	342.971	450.914	9.79368	0	0	0.03
trial1	923	129	DB	2.7488	571.454	480.925	9.58979	2.72221	414.251	655.961	4.95553	0	0	0.022	2.7488	571.454	655.961	14.5453	0	0	0.022
trial1	923	129	HP	7.35106	404.044	597.055	9.49157	7.36262	234.696	571.614	11.5318	0	0	0.0505	7.35106	404.044	597.055	21.0234	0	0	0.0505
trial1	923	129	LP	7.36697	464.169	526.665	10.3329	7.53331	218.872	1358.69	8.46156	0	0	0.021	7.36697	464.169	1358.69	18.7945	0	0	0.021
trial1	924	129	CS	4.31769	224.542	413.107	5.71625	4.31796	82.0872	312.588	5.36293	0	0	0.034	4.31769	224.542	413.107	11.0792	0	0	0.034
trial1	924	129	DB	4.25213	854.785	1198.64	7.19153	4.18191	677.357	430.203	8.08531	0	0	0.0285	4.25213	854.785	1198.64	15.2768	0	0	0.0285
trial1	924	129	HP	3.32843	97.3969	261.749	5.1392	10.0209	574.137	604.153	77.654	0	0	0.413	10.0086	574.137	604.153	82.7932	0	0	0.413
trial1	924	129	LP	15.1914	762.802	2055.29	17.705	15.0811	516.112	970.716	17.0803	0	0	0.0455	15.1914	762.802	2055.29	34.7853	0	0	0.0455
trial1	925	129	CS	4.94408	187.702	680.764	6.46524	4.94424	278.827	291.411	8.38416	0	0	0.0345	4.94408	278.827	680.764	14.8494	0	0	0.0345
trial1	925	129	DB	3.78566	1096.44	725.949	8.03694	3.59894	995.297	876.566	7.81065	0	0	0.0195	3.78566	1096.44	876.566	15.8476	0	0	0.0195
trial1	925	129	HP	9.07829	659.258	695.284	14.5129	9.13085	522.465	290.051	49.6889	0	0	0.358	9.07829	659.258	695.284	64.2018	0	0	0.358
trial1	925	129	LP	3.38381	249.354	410.173	5.35794	3.41328	174.289	364.505	5.98089	0	0	0.032	3.38381	249.354	410.173	11.3388	0	0	0.032
trial1	926	129	CS	7.58836	1038.81	1001.88	11.7246	7.63185	1038.81	558.797	9.88181	0	0	0.0285	7.58836	1038.81	1001.88	21.6064	0	0	0.0285
trial1	926	129	DB	4.60595	223.535	434.945	6.97995	4.6712	337.973	446.307	9.08486	0	0	0.045	4.60595	337.973	446.307	16.0648	0	0	0.045
trial1	926	129	HP	17.1172	258.868	293.604	25.0347	17.1123	199.43	290.702	31.7696	0	0	0.222	17.1172	258.868	293.604	56.8043	0	0	0.222
trial1	926	129	LP	9.34499	742.728	798.942	14.8951	9.37882	524.262	962.909	10.9405	0	0	0.026	9.34499	742.728	962.909	25.8356	0	0	0.026
trial1	927	129	CS	4.82144	161.808	280.548	8.47338	4.83144	257.07	87.5525	18.55	0	0	0.1355	4.82144	257.07	280.548	27.0233	0	0	0.1355
trial1	927	129	DB	8.90154	616.271	598.002	17.0417	8.91325	241.422	181.401	51.5309	0	0	0.347	8.90154	616.271	598.002	68.5726	0	0	0.347
trial1	927	129	HP	1.81642	186.028	410.478	2.1154	7.4734	2126.12	931.138	75.1792	4	0.069	0.1385	7.4014	2126.12	931.138	77.2946	4	0.069	0.1385
trial1	927	129	LP	5.56261	248.569	477.775	6.62501	6.97919	238.938	689.605	25.4256	3	0.077	0.0335	6.96786	248.569	689.605	32.0506	3	0.077	0.0335
trial1	928	129	CS	3.49184	226.307	192.344	6.6741	3.59546	233.978	245.771	8.57862	0	0	0.0505	3.49184	233.978	245.771	15.2527	0	0	0.0505
trial1	928	129	DB	5.03422	558.214	457.732	8.805	5.04691	441.568	299.799	9.22932	0	0	0.036	5.03422	558.214	457.732	18.0343	0	0	0.036
trial1	928	129	HP	10.5718	485.98	257.421	22.1242	12.2629	478.806	247.103	25.4296	0	0	0.1765	12.2189	485.98	257.421	47.5538	0	0	0.1765
trial1	928	129	LP	4.82749	437.454	260.384	14.9281	5.377	347.429	365.987	11.3081	0	0	0.0485	5.32203	437.454	365.987	26.2362	0	0	0.0485
trial1	929	129	CS	3.34449	402.119	277.173	8.7283	3.34153	305.182	157.636	7.23688	0	0	0.0525	3.34449	402.119	277.173	15.9652	0	0	0.0525
trial1	929	129	DB	3.22823	505.773	467.213	8.40673	3.24422	334.029	392.544	6.2139	2	0.012	0.023	3.22823	505.773	467.213	14.6206	2	0.012	0.023
trial1	929	129	HP	8.91725	459.206	692.376	12.1537	9.00272	469.53	899.429	42.1828	0	0	0.3965	8.91725	469.53	899.429	54.3365	0	0	0.3965
trial1	929	129	LP	7.41739	505.767	740.448	10.6655	7.41908	438.482	742.069	9.47175	0	0	0.026	7.41739	505.767	742.069	20.1373	0	0	0.026
trial1	930	129	CS	2.71275	182.307	178.906	5.72358	2.71097	290.6	188.725	6.74378	0	0	0.0515	2.71275	290.6	188.725	12.4674	0	0	0.0515
trial1	930	129	DB	4.71161	299.113	342.21	7.17188	4.72418	209.259	358.027	7.02121	0	0	0.042	4.71161	299.113	358.027	14.1931	0	0	0.042
trial1	930	129	HP	10.5663	817.055	1576.76	12.4215	11.3356	2588.94	2333.32	73.5532	3	0.041	0.148	11.3356	2588.94	2333.32	85.9747	3	0.041	0.148
trial1	930	129	LP	8.52837	723.956	1471.62	14.2978	8.62526	448.949	558.395	10.9901	0	0	0.031	8.52837	723.956	1471.62	25.2879	0	0	0.031
trial1	931	BalbC	CS	9.2704	900.361	1143.94	13.7881	9.26333	670.988	662.661	14.7745	0	0	0.0325	9.2704	900.361	1143.94	28.5626	0	0	0.0325
trial1	931	BalbC	DB	8.35593	572.224	963.082	10.9619	8.48002	523.771	390.102	17.2416	0	0	0.055	8.35593	572.224	963.082	28.2034	0	0	0.055
trial1	931	BalbC	HP	20.0988	2124.46	2352.61	43.4875	27.4981	3399.12	1466.55	104.32	2	0.0305	0.112	25.9237	3399.12	2352.61	147.807	2	0.0305	0.112
trial1	931	BalbC	LP	9.47222	765.352	1140.73	13.6588	9.48616	616.217	1006.64	27.2613	2	0.03	0.0825	9.47222	765.352	1140.73	40.9201	2	0.03	0.0825
trial1	932	BalbC	CS	8.41216	438.619	894.886	13.6683	8.43798	632.57	364.868	19.3593	2	0.0395	0.043	8.41216	632.57	894.886	33.0275	2	0.0395	0.043
trial1	932	BalbC	DB	13.7918	945.907	1415.01	17.5903	13.8057	606.004	971.241	24.2876	0	0	0.054	13.7918	945.907	1415.01	41.8779	0	0	0.054
trial1	932	BalbC	HP	30.893	2400.88	2360.67	48.6846	31.0662	1680.23	1678.83	65.4806	0	0	0.086	30.893	2400.88	2360.67	114.165	0	0	0.086
trial1	932	BalbC	LP	30.4099	3092.93	3845.92	43.0848	31.9158	2151.48	847.828	95.5908	2	0.052	0.2205	31.8075	3092.93	3845.92	138.676	2	0.052	0.2205
trial1	933	BalbC	CS	9.18944	911.462	1086.34	12.5254	9.16159	440.569	662.498	11.935	0	0	0.04	9.18944	911.462	1086.34	24.4604	0	0	0.04
trial1	933	BalbC	DB	12.1676	927.792	1208.57	15.9269	12.0164	848.115	599.46	24.063	0	0	0.067	12.1676	927.792	1208.57	39.9899	0	0	0.067
trial1	933	BalbC	HP	7.60222	661.673	677.611	15.8013	33.7941	2309.37	2808.19	130.241	0	0	0.1195	33.7941	2309.37	2808.19	146.042	0	0	0.1195
trial1	933	BalbC	LP	11.8769	826.653	1006.86	17.6139	11.8564	659.14	501.825	14.2721	0	0	0.0485	11.8769	826.653	1006.86	31.886	0	0	0.0485
trial1	934	BalbC	CS	7.10654	368.073	759.727	7.80008	7.06902	1143.73	1156.82	11.6148	0	0	0.0225	7.10654	1143.73	1156.82	19.4149	0	0	0.0225
trial1	934	BalbC	DB	12.1109	451.868	1238.23	13.4322	13.8259	2041.33	1637.21	326.446	13	0.227	1.656	13.815	2041.33	1637.21	339.879	13	0.227	1.656
trial1	934	BalbC	HP	19.3169	1914.72	1553.76	24.7334	21.1916	2438.44	748.084	68.3633	2	0.0875	0.0515	20.8407	2438.44	1553.76	93.0967	2	0.0875	0.0515
trial1	934	BalbC	LP	12.1704	1057.94	1305.87	15.4536	12.2767	1125.79	1271.6	16.3853	0	0	0.0225	12.1704	1125.79	1305.87	31.8389	0	0	0.0225
trial1	935	BalbC	CS	7.03901	550.611	823.004	10.777	7.07048	538.454	745.466	11.538	0	0	0.03	7.03901	550.611	823.004	22.315	0	0	0.03
trial1	935	BalbC	DB	10.8884	546.458	1390.23	13.2598	10.8747	1029.71	1388.61	24.0255	3	0.02	0.021	10.8884	1029.71	1390.23	37.2853	3	0.02	0.021
trial1	935	BalbC	HP	34.3575	3764.79	2271.62	67.042	34.2527	2471.23	1946.44	158.375	2	0.02	0.397	34.3575	3764.79	2271.62	225.417	2	0.02	0.397
trial1	935	BalbC	LP	15.5803	2023.97	2274.15	24.8607	16.6544	2006.1	1622.65	111.611	4	0.0675	0.269	16.6544	2023.97	2274.15	136.472	4	0.0675	0.269
trial1	936	BalbC	CS	11.9988	1398.72	811.94	33.6304	12.0232	644.277	980.809	17.1252	0	0	0.0335	11.9988	1398.72	980.809	50.7555	0	0	0.0335
trial1	936	BalbC	DB	8.38075	644.746	972.166	12.0457	8.3697	944.245	509.698	19.468	0	0	0.0505	8.38075	944.245	972.166	31.5137	0	0	0.0505
trial1	936	BalbC	HP	13.175	1087.04	1458.78	18.6997	13.1739	1420.12	939.804	24.4173	0	0	0.0395	13.175	1420.12	1458.78	43.1171	0	0	0.0395
trial1	936	BalbC	LP	16.071	1469.04	1422.19	22.6357	16.0873	825.677	961.046	24.1725	2	0.0445	0.0255	16.071	1469.04	1422.19	46.8081	2	0.0445	0.0255
trial1	937	BalbC	CS	6.72513	606.541	728.045	9.60488	6.58083	826.314	520.018	19.5668	0	0	0.033	6.72513	826.314	728.045	29.1717	0	0	0.033
trial1	937	BalbC	DB	3.19568	333.767	333.882	6.30876	3.3179	482.363	326.707	6.62111	0	0	0.028	3.19568	482.363	333.882	12.9299	0	0	0.028
trial1	937	BalbC	HP	10.2622	1047.25	847.159	15.9083	11.0494	1892.51	1162.56	51.1592	2	0.0335	0.022	11.0461	1892.51	1162.56	67.0675	2	0.0335	0.022
trial1	937	BalbC	LP	12.3622	1216.1	1031.51	27.2828	12.381	595.445	529.538	36.2014	2	0.0345	0.0945	12.3622	1216.1	1031.51	63.4841	2	0.0345	0.0945
trial1	938	BalbC	CS	7.17972	623.674	638.035	13.4879	7.20345	514.163	615.186	11.4684	0	0	0.027	7.17972	623.674	638.035	24.9563	0	0	0.027
trial1	938	BalbC	DB	12.7821	1103.42	1028.95	20.461	12.795	655.458	497.411	21.1816	0	0	0.0655	12.7821	1103.42	1028.95	41.6426	0	0	0.0655
trial1	938	BalbC	HP	18.4204	1222.14	1164.41	28.761	18.4176	853.69	403.416	36.2634	0	0	0.1205	18.4204	1222.14	1164.41	65.0244	0	0	0.1205
trial1	938	BalbC	LP	5.97439	623.122	308.394	12.4343	5.97812	284.553	310.553	8.23888	0	0	0.039	5.97439	623.122	310.553	20.6732	0	0	0.039
trial1	939	BalbC	CS	11.64	1207.69	1051.68	24.5656	11.9398	871.247	440.329	23.9509	0	0	0.0585	11.64	1207.69	1051.68	48.5164	0	0	0.0585
trial1	939	BalbC	DB	13.3885	817.368	1202.89	16.9917	13.4526	478.883	501.676	18.7944	2	0.033	0.05	13.3885	817.368	1202.89	35.7861	2	0.033	0.05
trial1	939	BalbC	HP	5.79684	1199.06	1687.76	37.7049	25.2355	2216.14	2858.39	96.1164	2	0.0275	0.1695	25.2088	2216.14	2858.39	133.821	2	0.0275	0.1695
trial1	939	BalbC	LP	6.67706	435.088	521.663	9.22901	6.70999	431.181	553.222	9.2718	0	0	0.032	6.67706	435.088	553.222	18.5008	0	0	0.032
trial1	940	BalbC	CS	9.78047	1368.22	1011.92	15.5301	9.81722	1001.76	507.603	22.0932	0	0	0.0595	9.78047	1368.22	1011.92	37.6234	0	0	0.0595
trial1	940	BalbC	DB	7.82966	667.284	902.076	10.8926	7.89559	551.756	405.346	24.3663	2	0.031	0.062	7.82966	667.284	902.076	35.2589	2	0.031	0.062
trial1	940	BalbC	HP	16.5546	1610.1	960.178	31.2759	16.5296	1276.12	977.878	46.1839	0	0	0.078	16.5546	1610.1	977.878	77.4599	0	0	0.078
trial1	940	BalbC	LP	12.7319	2518.17	1635.71	20.765	16.1192	3253.08	1339.63	65.7388	2	0.03	0.0335	15.972	3253.08	1635.71	86.5039	2	0.03	0.0335
trial1	941	AJ	CS	6.34418	712.948	1407.07	8.24875	6.2733	1926.96	1712.35	30.3101	3	0.019	0.016	6.34418	1926.96	1712.35	38.5589	3	0.019	0.016
trial1	941	AJ	DB	4.36969	2099.12	570.277	11.6452	4.39821	2365.48	1202.11	17.4221	0	0	0.021	4.36969	2365.48	1202.11	29.0673	0	0	0.021
trial1	941	AJ	HP	6.80152	678.545	1087.3	9.27528	6.68565	1220.3	1732.84	9.703	0	0	0.02	6.80152	1220.3	1732.84	18.9783	0	0	0.02
trial1	941	AJ	LP	3.36307	1600.11	603.034	8.85235	3.64757	888.13	1440.62	6.723	0	0	0.019	3.36307	1600.11	1440.62	15.5753	0	0	0.019
trial1	942	AJ	CS	3.26259	450.03	432.253	8.04528	3.24553	572.755	286.874	8.56117	0	0	0.0265	3.26259	572.755	432.253	16.6064	0	0	0.0265
trial1	942	AJ	DB	8.56419	1357.15	1071.49	13.1138	8.60573	1432.34	973.304	14.9984	0	0	0.031	8.56419	1432.34	1071.49	28.1122	0	0	0.031
trial1	942	AJ	HP	20.5825	924.968	2362.01	25.9006	20.6977	1041.56	1183.49	43.1366	0	0	0.0685	20.5825	1041.56	2362.01	69.0372	0	0	0.0685
trial1	942	AJ	LP	10.8752	1565.73	1449.96	14.7339	10.7227	3804.76	1583.89	107.403	4	0.052	0.0515	10.8752	3804.76	1583.89	122.137	4	0.052	0.0515
trial1	943	AJ	CS	5.21953	1392.78	1006.84	13.584	5.24741	770.057	499.382	8.18304	0	0	0.0275	5.21953	1392.78	1006.84	21.767	0	0	0.0275
trial1	943	AJ	DB	6.74394	900.084	636.859	10.8761	7.01131	900.084	623.223	14.9997	0	0	0.044	6.74394	900.084	636.859	25.8758	0	0	0.044
trial1	943	AJ	HP	22.4836	2483.7	1619.64	32.7889	26.487	3688.27	1495.04	68.6992	2	0.0205	0.109	26.3399	3688.27	1619.64	101.488	2	0.0205	0.109
trial1	943	AJ	LP	9.02131	2223.66	1686.57	15.8904	9.28966	2866.26	1503.07	107.778	2	0.0345	0.5365	9.02131	2866.26	1686.57	123.668	2	0.0345	0.5365
trial1	944	AJ	CS	2.93012	492.964	621.914	7.65852	2.91589	429.459	232.335	26.3576	0	0	0.209	2.93012	492.964	621.914	34.0161	0	0	0.209
trial1	944	AJ	DB	3.43865	775.612	497.579	12.5362	3.71507	653.828	350.752	17.3739	0	0	0.0565	3.43865	775.612	497.579	29.9102	0	0	0.0565
trial1	944	AJ	HP	19.0566	2201.94	1519.83	33.1546	19.0771	1527.83	963.05	53.2592	2	0.0255	0.076	19.0566	2201.94	1519.83	86.4138	2	0.0255	0.076
trial1	944	AJ	LP	9.32827	2552.93	1408.79	15.9276	15.6623	3182.29	1325.46	70.0388	2	0.025	0.0335	15.536	3182.29	1408.79	85.9664	2	0.025	0.0335
trial1	945	AJ	CS	4.84345	403.032	386.54	11.4441	4.91247	302.915	259.676	10.0612	0	0	0.042	4.84345	403.032	386.54	21.5053	0	0	0.042
trial1	945	AJ	DB	5.47175	693.751	555.411	10.9416	5.78989	760.566	591.629	11.6163	0	0	0.025	5.47175	760.566	591.629	22.5579	0	0	0.025
trial1	945	AJ	HP	13.5392	3626.83	1360.03	40.2816	28.9508	2274.83	2449.33	151.843	0	0	0.19	28.9508	3626.83	2449.33	192.125	0	0	0.19
trial1	945	AJ	LP	8.21825	1536.57	827.886	14.8119	8.24089	1712.22	1356.3	17.0797	0	0	0.021	8.21825	1712.22	1356.3	31.8916	0	0	0.021
trial1	946	AJ	CS	9.36059	1378.5	1080.82	17.8805	9.44642	1282.28	595.713	15.0593	0	0	0.0325	9.36059	1378.5	1080.82	32.9398	0	0	0.0325
trial1	946	AJ	DB	2.89213	575.636	276.988	8.56732	3.38534	854.695	534.947	13.9625	0	0	0.04	3.37466	854.695	534.947	22.5299	0	0	0.04
trial1	946	AJ	HP	10.7238	1163.92	1053.02	17.4385	28.4574	1260.31	1944.17	94.1734	2	0.031	0.1335	28.3214	1260.31	1944.17	111.612	2	0.031	0.1335
trial1	946	AJ	LP	11.0584	700.034	677.849	17.2452	11.1461	286.624	368.279	13.1397	0	0	0.058	11.0584	700.034	677.849	30.3849	0	0	0.058
trial1	947	AJ	CS	3.32447	666.849	418.848	7.7682	3.26178	443.004	276.795	14.5785	0	0	0.0755	3.32447	666.849	418.848	22.3467	0	0	0.0755
trial1	947	AJ	DB	11.6454	881.956	1063.16	16.2742	11.6448	1101.57	795.113	36.7488	0	0	0.0605	11.6454	1101.57	1063.16	53.023	0	0	0.0605
trial1	947	AJ	HP	8.37765	1516.02	741.477	18.285	8.41985	2131.38	868.05	28.4399	0	0	0.048	8.37765	2131.38	868.05	46.7248	0	0	0.048
trial1	947	AJ	LP	6.86002	750.956	644.066	10.6289	6.86123	694.415	548.737	11.2841	0	0	0.028	6.86002	750.956	644.066	21.913	0	0	0.028
trial1	948	AJ	CS	3.46432	515.151	275.772	9.17905	3.51892	508.944	228.144	13.4438	0	0	0.057	3.46432	515.151	275.772	22.6229	0	0	0.057
trial1	948	AJ	DB	3.98114	315.058	265.909	11.5683	4.37307	280.792	281.241	14.5033	0	0	0.069	4.31444	315.058	281.241	26.0716	0	0	0.069
trial1	948	AJ	HP	8.23695	712.694	466.83	15.7685	14.037	2003.13	1486.74	125.246	2	0.024	0.331	13.9344	2003.13	1486.74	141.014	2	0.024	0.331
trial1	948	AJ	LP	12.2693	1700.74	1219.78	17.5964	12.4269	2811.36	1390.72	51.7342	0	0	0.056	12.2693	2811.36	1390.72	69.3306	0	0	0.056
trial1	949	AJ	CS	5.77588	388.419	469.251	11.3031	5.77578	438.084	303.368	12.13	0	0	0.0375	5.77588	438.084	469.251	23.433	0	0	0.0375
trial1	949	AJ	DB	4.09991	483.765	287.143	7.16808	4.14747	527.614	404.431	8.53904	0	0	0.025	4.09991	527.614	404.431	15.7071	0	0	0.025
trial1	949	AJ	HP	10.1532	638.914	715.234	16.2918	14.066	700.202	1060.38	73.9658	4	0.0715	0.1565	14.066	700.202	1060.38	90.2577	4	0.0715	0.1565
trial1	949	AJ	LP	10.1084	561.694	1342.41	11.6617	10.3203	1772.43	1365.44	65.9184	3	0.0905	0.0535	10.1084	1772.43	1365.44	77.58	3	0.0905	0.0535
trial1	950	AJ	CS	8.27655	611.924	769.84	16.6277	8.38895	756.156	1116.52	15.403	0	0	0.052	8.27655	756.156	1116.52	32.0307	0	0	0.052
trial1	950	AJ	DB	4.34553	508.727	501.472	8.16736	4.28354	511.526	442.922	12.1729	0	0	0.0445	4.34553	511.526	501.472	20.3402	0	0	0.0445
trial1	950	AJ	HP	9.50001	891.796	958.267	15.9284	9.60907	539.63	1578.39	12.1836	0	0	0.022	9.50001	891.796	1578.39	28.112	0	0	0.022
trial1	950	AJ	LP	8.76491	700.569	733.424	11.7848	8.72217	662.74	1051.31	11.1434	0	0	0.0245	8.76491	700.569	1051.31	22.9282	0	0	0.0245
trial1	956	C57B6-	CS	4.00993	906.588	525.149	9.76991	4.25237	812.416	1042.49	7.74776	0	0	0.0215	4.00993	906.588	1042.49	17.5177	0	0	0.0215
trial1	956	C57B6-	DB	7.18129	1262.27	1357.67	11.6493	7.04602	1154	978.16	10.9726	0	0	0.0205	7.18129	1262.27	1357.67	22.6219	0	0	0.0205
trial1	956	C57B6-	HP	23.1732	6967	4434.87	59.3056	25.2132	4278.55	2711.77	48.0348	0	0	0.024	23.1732	6967	4434.87	107.34	0	0	0.024
trial1	956	C57B6-	LP	3.10771	6065.17	2149.61	19.7685	8.77731	6850.29	2138.14	42.428	2	0.0185	0.014	7.76923	6850.29	2149.61	62.1964	2	0.0185	0.014
trial1	957	C57B6-	CS	3.87337	1233.84	786.22	7.37534	3.84634	1269.01	613.756	10.3569	0	0	0.0225	3.87337	1269.01	786.22	17.7322	0	0	0.0225
trial1	957	C57B6-	DB	17.3036	862.05	4097.4	20.521	17.1577	2160.27	2700.98	48.1706	2	0.009	0.071	17.3036	2160.27	4097.4	68.6916	2	0.009	0.071
trial1	957	C57B6-	HP	28.468	4416.55	4371.49	45.6452	28.0236	4647.24	2144.16	83.088	2	0.0285	0.081	28.468	4647.24	4371.49	128.733	2	0.0285	0.081
trial1	957	C57B6-	LP	9.32451	2150.47	2142.62	13.2172	9.496	4893.18	2254.16	69.9736	4	0.0245	0.0545	9.32451	4893.18	2254.16	83.1908	4	0.0245	0.0545
trial1	958	C57B6-	CS	4.69794	1103.96	1068.08	7.67914	5.10594	506.348	363.561	16.3135	0	0	0.051	5.04494	1103.96	1068.08	23.9927	0	0	0.051
trial1	958	C57B6-	DB	7.97143	837.479	1880.09	9.16762	7.85506	488.217	1304.91	21.2933	3	0.02	0.026	7.97143	837.479	1880.09	30.4609	3	0.02	0.026
trial1	958	C57B6-	HP	11.2217	4192.86	1251.88	24.6245	19.6741	2234.61	3055.37	112.427	2	0.0315	0.3015	19.6741	4192.86	3055.37	137.052	2	0.0315	0.3015
trial1	958	C57B6-	LP	11.9201	3607.19	3837.55	16.8247	11.66	3949.52	3592.71	83.0327	5	0.057	0.0655	11.9201	3949.52	3837.55	99.8574	5	0.057	0.0655
trial1	959	C57B6-	CS	5.18604	748.624	1172.04	8.46875	5.18604	745.17	805.939	8.01898	0	0	0.0215	5.18604	748.624	1172.04	16.4877	0	0	0.0215
trial1	959	C57B6-	DB	6.78322	1526.24	1393.79	11.6753	6.78322	1499.44	788.059	16.0292	0	0	0.026	6.78322	1526.24	1393.79	27.7045	0	0	0.026
trial1	959	C57B6-	HP	23.9686	5434.33	1782.87	51.1396	24.3118	4651.45	2172.09	48.6243	0	0	0.03	23.9686	5434.33	2172.09	99.7639	0	0	0.03
trial1	959	C57B6-	LP	8.67812	1204.28	2088.91	10.241	8.96317	1477.31	2649.27	52.8151	2	0.0485	0.137	8.67812	1477.31	2649.27	63.0561	2	0.0485	0.137
trial1	960	C57B6-	CS	2.78473	279.713	350.214	5.08376	2.78752	287.668	471.878	3.20495	0	0	0.0205	2.78473	287.668	471.878	8.28871	0	0	0.0205
trial1	960	C57B6-	DB	8.20854	511.169	1210.98	18.7574	8.40392	791.687	536.64	14.734	0	0	0.0335	8.20854	791.687	1210.98	33.4914	0	0	0.0335
trial1	960	C57B6-	HP	16.5096	1308.89	1782.26	22.8547	16.6923	1786.99	2758.82	51.6219	2	0.0135	0.0425	16.5096	1786.99	2758.82	74.4766	2	0.0135	0.0425
trial1	960	C57B6-	LP	14.0451	2615.95	3149.78	18.8611	13.509	2872.53	1500.2	23.3641	0	0	0.023	14.0451	2872.53	3149.78	42.2252	0	0	0.023
trial1	961	C57B6-	CS	3.64785	1100.36	828.337	8.68803	3.62489	1378.13	681.075	10.8691	0	0	0.0205	3.64785	1378.13	828.337	19.5571	0	0	0.0205
trial1	961	C57B6-	DB	13.6646	3272.29	3268.49	19.5189	17.4052	3858.79	1926.11	69.3165	2	0.024	0.068	17.1692	3858.79	3268.49	88.8354	2	0.024	0.068
trial1	961	C57B6-	HP	15.3592	1642	2292.02	22.2221	15.492	1161.46	1950.07	19.3922	0	0	0.027	15.3592	1642	2292.02	41.6143	0	0	0.027
trial1	961	C57B6-	LP	10.6812	1625.49	2043.44	13.9439	10.3009	3073.61	2232.89	41.0912	2	0.0085	0.023	10.6812	3073.61	2232.89	55.035	2	0.0085	0.023
trial1	962	C57B6-	CS	5.80317	897.573	1093.6	9.36152	5.77075	535.42	301.486	11.2075	0	0	0.0475	5.80317	897.573	1093.6	20.5691	0	0	0.0475
trial1	962	C57B6-	DB	5.37449	1489.16	1152.72	11.1753	5.47324	1453.98	1075.32	9.72077	0	0	0.0195	5.37449	1489.16	1152.72	20.8961	0	0	0.0195
trial1	962	C57B6-	HP	24.6967	4212.79	5378.78	36.5319	24.1271	4902.26	3246.61	64.1509	0	0	0.0675	24.6967	4902.26	5378.78	100.683	0	0	0.0675
trial1	962	C57B6-	LP	11.5808	2532.67	2747.84	16.9136	11.3667	1499.49	1397.64	16.0167	0	0	0.021	11.5808	2532.67	2747.84	32.9303	0	0	0.021
trial1	963	C57B6-	CS	3.76679	1019.38	880.587	6.40404	3.68574	276.911	478.121	6.2188	0	0	0.0255	3.76679	1019.38	880.587	12.6228	0	0	0.0255
trial1	963	C57B6-	DB	8.96818	1248.29	2772.75	13.5572	8.92121	1112.82	799.17	13.8768	0	0	0.0275	8.96818	1248.29	2772.75	27.434	0	0	0.0275
trial1	963	C57B6-	HP	3.97455	969.877	1065.25	6.19439	13.6288	4929.19	2564.33	76.6513	2	0.02	0.026	13.5927	4929.19	2564.33	82.8457	2	0.02	0.026
trial1	963	C57B6-	LP	7.13511	2256.82	2009.21	10.5052	11.8592	4934.01	1945.47	55.942	2	0.0205	0.012	11.5907	4934.01	2009.21	66.4472	2	0.0205	0.012
trial1	964	C57B6-	CS	8.47599	970.782	1763.31	9.7809	8.43455	302.107	729.478	22.4045	0	0	0.1675	8.47599	970.782	1763.31	32.1854	0	0	0.1675
trial1	964	C57B6-	DB	6.23509	1153.73	1387.08	11.1609	6.08405	748.524	503.458	12.389	0	0	0.035	6.23509	1153.73	1387.08	23.5499	0	0	0.035
trial1	964	C57B6-	HP	12.7086	4983.03	1968.23	33.1127	15.003	4198.62	2707.8	45.0727	3	0.044	0.0105	12.8988	4983.03	2707.8	78.1855	3	0.044	0.0105
trial1	964	C57B6-	LP	12.4544	2148.99	3086.57	18.4421	12.1839	997.855	959.791	38.0431	0	0	0.1935	12.4544	2148.99	3086.57	56.4853	0	0	0.1935
trial1	965	C57B6-	CS	6.4134	1172.94	1476.27	10.2505	6.24504	1117.09	850.963	11.3836	0	0	0.0215	6.4134	1172.94	1476.27	21.6341	0	0	0.0215
trial1	965	C57B6-	DB	12.9577	1097.45	3844.97	16.4603	12.3412	397.351	2369.77	14.3172	0	0	0.0195	12.9577	1097.45	3844.97	30.7775	0	0	0.0195
trial1	965	C57B6-	HP	12.4384	1359.96	1075.79	19.187	12.6582	989.84	818.56	34.5196	0	0	0.0795	12.4384	1359.96	1075.79	53.7066	0	0	0.0795
trial1	965	C57B6-	LP	14.7366	1787.96	3231.36	21.6515	14.3408	4204.63	2802.74	63.5144	0	0	0.087	14.7366	4204.63	3231.36	85.1659	0	0	0.087
trial2	101	CBA	CS	3.94848	293.198	480.309	4.53776	3.91246	301.724	483.903	4.66329	0	0	0.022	3.94848	301.724	483.903	9.20106	0	0	0.022
trial2	101	CBA	DB	5.87021	442.788	505.928	8.2281	5.8624	622.426	541.89	7.44106	0	0	0.0235	5.87021	622.426	541.89	15.6692	0	0	0.0235
trial2	101	CBA	HP	25.4589	721.497	2073.33	29.846	25.4118	1364.4	784.68	38.7791	3	0.0985	0.0465	25.4589	1364.4	2073.33	68.6251	3	0.0985	0.0465
trial2	101	CBA	LP	13.5007	758.899	1664.9	15.3262	13.5777	1409.46	935.203	33.8004	2	0.0345	0.038	13.5007	1409.46	1664.9	49.1266	2	0.0345	0.038
trial2	102	CBA	CS	4.09956	137.7	224.153	4.61099	4.1107	164.199	226.7	3.69652	0	0	0.0295	4.09956	164.199	226.7	8.30751	0	0	0.0295
trial2	102	CBA	DB	5.05834	920.836	515.884	13.2754	5.05992	933.517	407.411	13.4964	0	0	0.0295	5.05834	933.517	515.884	26.7718	0	0	0.0295
trial2	102	CBA	HP	9.75131	1383.63	770.199	19.3149	9.73039	867.702	724.356	21.5323	2	0.043	0.016	9.75131	1383.63	770.199	40.8472	2	0.043	0.016
trial2	102	CBA	LP	14.5107	995.626	1453.51	18.7107	17.8538	1930.37	725.38	38.3209	2	0.024	0.0465	17.8538	1930.37	1453.51	57.0316	2	0.024	0.0465
trial2	103	CBA	CS	4.58381	601.295	551.999	9.21366	4.60667	398.199	440.962	6.59987	0	0	0.027	4.58381	601.295	551.999	15.8135	0	0	0.027
trial2	103	CBA	DB	7.66044	404.599	565.742	9.29604	7.63766	621.5	412.86	11.2786	0	0	0.0325	7.66044	621.5	565.742	20.5747	0	0	0.0325
trial2	103	CBA	HP	14.437	1061.01	1261.29	20.8618	16.6706	1556.88	826.102	31.1633	0	0	0.055	16.6706	1556.88	1261.29	52.0251	0	0	0.055
trial2	103	CBA	LP	13.1424	1502.29	1584.67	15.9916	14.4401	1957.96	1100.31	44.4129	2	0.027	0.0295	14.4223	1957.96	1584.67	60.4044	2	0.027	0.0295
trial2	104	CBA	CS	47.6742	3581.07	2984.89	81.6991	47.6331	3975.07	2073.67	111.723	0	0	0.0495	47.6742	3975.07	2984.89	193.422	0	0	0.0495
trial2	104	CBA	DB	8.34026	682.309	881.756	12.2561	8.35661	671.564	687.569	13.4171	0	0	0.027	8.34026	682.309	881.756	25.6732	0	0	0.027
trial2	104	CBA	HP	14.7465	1329.25	1253.32	22.7455	18.4508	2740.57	1245.54	106.91	4	0.0585	0.088	18.4475	2740.57	1253.32	129.655	4	0.0585	0.088
trial2	104	CBA	LP	15.5244	1182.78	1930.54	18.0501	18.0448	2355.24	2506.55	64.4998	2	0.0235	0.0555	18.0273	2355.24	2506.55	82.55	2	0.0235	0.0555
trial2	105	CBA	CS	3.23914	300.965	302.516	4.67657	3.2368	375.74	282.098	7.56427	0	0	0.0315	3.23914	375.74	302.516	12.2408	0	0	0.0315
trial2	105	CBA	DB	2.80809	574.696	405.725	5.40233	2.81003	667.937	466.756	7.74936	0	0	0.0225	2.80809	667.937	466.756	13.1517	0	0	0.0225
trial2	105	CBA	HP	12.48	358.808	912.074	13.268	13.4081	2205.44	1004.63	47.6912	2	0.038	0.0205	13.4057	2205.44	1004.63	60.9593	2	0.038	0.0205
trial2	105	CBA	LP	7.67129	1196.91	785.917	15.8127	7.67129	692.013	555.624	11.8194	0	0	0.0275	7.67129	1196.91	785.917	27.6321	0	0	0.0275
trial2	106	CBA	CS	4.37962	312.379	754.015	5.34768	4.38598	802.294	299.327	11.6751	0	0	0.034	4.37962	802.294	754.015	17.0228	0	0	0.034
trial2	106	CBA	DB	8.51671	209.067	1020.96	8.92046	8.5248	543.627	420.896	14.3993	0	0	0.04	8.51671	543.627	1020.96	23.3198	0	0	0.04
trial2	106	CBA	HP	26.0153	2428.52	1278.3	48.2451	26.0199	882.38	1008.58	32.7807	0	0	0.052	26.0153	2428.52	1278.3	81.0258	0	0	0.052
trial2	106	CBA	LP	7.94553	1057.74	853.826	16.297	7.94594	1062.13	464.648	18.3197	0	0	0.0365	7.94553	1062.13	853.826	34.6167	0	0	0.0365
trial2	107	CBA	CS	51.8431	7696.85	4010.04	98.2294	52.0155	7013.79	4133.42	92.1871	0	0	0.027	51.8431	7696.85	4133.42	190.417	0	0	0.027
trial2	107	CBA	DB	6.33498	1050.58	413.817	13.9895	6.31258	1050.58	637.515	13.2233	0	0	0.0285	6.33498	1050.58	637.515	27.2128	0	0	0.0285
trial2	107	CBA	HP	3.19917	1077.41	579.532	5.24866	11.6801	2987.61	1413.75	64.278	2	0.029	0.027	11.6801	2987.61	1413.75	69.5267	2	0.029	0.027
trial2	107	CBA	LP	4.25751	1076.13	477.537	13.0286	4.25019	1079.53	515.409	14.5846	0	0	0.024	4.25751	1079.53	515.409	27.6132	0	0	0.024
trial2	108	CBA	CS	4.97301	403.148	454.387	8.88477	4.97672	451.874	167.639	11.6147	0	0	0.0485	4.97301	451.874	454.387	20.4995	0	0	0.0485
trial2	108	CBA	DB	5.56724	621.347	566.317	8.39359	5.56381	895.162	475.213	15.2944	0	0	0.032	5.56724	895.162	566.317	23.688	0	0	0.032
trial2	108	CBA	HP	16.2397	2292.2	1077.06	41.8882	20.2365	2042.31	1068.88	57.0958	0	0	0.064	20.2365	2292.2	1077.06	98.984	0	0	0.064
trial2	108	CBA	LP	10.2411	1056.66	711.016	18.0067	10.254	773.279	737.336	14.9748	0	0	0.038	10.2411	1056.66	737.336	32.9816	0	0	0.038
trial2	109	CBA	CS	4.02443	469.727	373.249	7.25805	4.0201	439.335	451.893	7.81316	0	0	0.0255	4.02443	469.727	451.893	15.0712	0	0	0.0255
trial2	109	CBA	DB	5.98702	722.355	378.583	12.697	6.04655	537.755	400.355	10.307	0	0	0.0445	5.98702	722.355	400.355	23.004	0	0	0.0445
trial2	109	CBA	HP	7.63028	1338.62	938.373	13.1723	15.9827	2140.12	1628.74	73.7026	3	0.0555	0.2145	15.9827	2140.12	1628.74	86.8749	3	0.0555	0.2145
trial2	109	CBA	LP	13.1331	819.197	1297.88	17.8314	14.0356	1821.41	865.6	38.8286	2	0.0175	0.0415	14.0198	1821.41	1297.88	56.66	2	0.0175	0.0415
trial2	110	CBA	CS	5.81823	889.067	588.151	11.1049	5.81004	634.687	566.045	13.4834	0	0	0.0315	5.81823	889.067	588.151	24.5883	0	0	0.0315
trial2	110	CBA	DB	8.88326	704.874	999.102	10.8667	8.88852	741.638	713.106	12.6929	0	0	0.027	8.88326	741.638	999.102	23.5595	0	0	0.027
trial2	110	CBA	HP	22.7845	807.282	1903.04	23.4567	22.7483	1160.71	832.489	32.0453	0	0	0.0935	22.7845	1160.71	1903.04	55.5021	0	0	0.0935
trial2	110	CBA	LP	5.78925	618.132	719.134	7.98114	6.38756	1136.72	569.46	40.5946	2	0.016	0.0675	6.38756	1136.72	719.134	48.5757	2	0.016	0.0675
trial2	111	DBA1	CS	4.03955	563.301	294.598	11.3161	4.21058	584.428	513.711	11.5594	0	0	0.0345	4.17293	584.428	513.711	22.8755	0	0	0.0345
trial2	111	DBA1	DB	6.74847	894.083	347.344	18.7545	6.74378	970.487	378.048	14.8431	0	0	0.03	6.74847	970.487	378.048	33.5976	0	0	0.03
trial2	111	DBA1	HP	18.321	710.492	1924.48	19.8761	18.5102	2226.68	1567.16	77.2713	2	0.0315	0.1425	18.321	2226.68	1924.48	97.1474	2	0.0315	0.1425
trial2	111	DBA1	LP	12.7661	684.816	1107.94	14.7126	12.7512	729.211	592.83	43.3442	0	0	0.176	12.7661	729.211	1107.94	58.0568	0	0	0.176
trial2	112	DBA1	CS	7.84664	525.016	945.229	9.47324	12.4445	641.703	743.819	33.0479	2	0.0315	0.097	12.4445	641.703	945.229	42.5212	2	0.0315	0.097
trial2	112	DBA1	DB	5.3597	698.708	459.849	10.0397	5.3597	700.377	558.28	10.1479	0	0	0.0265	5.3597	700.377	558.28	20.1876	0	0	0.0265
trial2	112	DBA1	HP	15.6974	1172.52	1418.43	20.1549	15.6074	770.071	245.781	52.9375	2	0.05	0.2605	15.6974	1172.52	1418.43	73.0924	2	0.05	0.2605
trial2	112	DBA1	LP	18.9334	1250.62	1525.17	26.0546	18.9803	1123.38	646.144	51.7095	0	0	0.193	18.9334	1250.62	1525.17	77.7641	0	0	0.193
trial2	113	DBA1	CS	4.26518	611.742	475.264	7.99923	4.28311	561.599	474.132	7.6766	0	0	0.026	4.26518	611.742	475.264	15.6758	0	0	0.026
trial2	113	DBA1	DB	6.27387	1049	610.919	12.4832	6.26163	743.126	517.308	11.8674	0	0	0.0265	6.27387	1049	610.919	24.3505	0	0	0.0265
trial2	113	DBA1	HP	3.73461	1209.01	613.63	5.81683	13.6677	2626.61	1775.53	83.0899	2	0.049	0.0215	13.6547	2626.61	1775.53	88.9067	2	0.049	0.0215
trial2	113	DBA1	LP	7.27922	557.587	926.854	9.18108	10.7299	2273.23	1199.63	53.9715	2	0.0265	0.0545	10.7299	2273.23	1199.63	63.1525	2	0.0265	0.0545
trial2	114	DBA1	CS	3.95606	826.76	479.184	9.57622	3.93826	448.887	699.107	6.0751	0	0	0.021	3.95606	826.76	699.107	15.6513	0	0	0.021
trial2	114	DBA1	DB	4.84903	61.6676	506.589	4.91492	4.84857	59.7541	264.628	4.51072	0	0	0.03	4.84903	61.6676	506.589	9.42564	0	0	0.03
trial2	114	DBA1	HP	10.7672	629.998	829.729	14.4881	11.8458	1123.96	1129.21	32.3404	0	0	0.0865	11.8297	1123.96	1129.21	46.8286	0	0	0.0865
trial2	114	DBA1	LP	7.38873	767.574	591.59	10.9215	7.37914	688.979	862.034	11.0773	0	0	0.0235	7.38873	767.574	862.034	21.9988	0	0	0.0235
trial2	115	DBA1	CS	4.3376	337.121	366.429	5.97248	4.33894	335.824	201.199	7.29056	0	0	0.042	4.3376	337.121	366.429	13.263	0	0	0.042
trial2	115	DBA1	DB	7.82412	1115.54	683.104	14.0691	7.87755	467.453	645.221	22.4772	0	0	0.14	7.82412	1115.54	683.104	36.5463	0	0	0.14
trial2	115	DBA1	HP	11.4952	1080.59	727.416	19.9618	11.5623	420.849	655.764	13.5863	0	0	0.059	11.4952	1080.59	727.416	33.5481	0	0	0.059
trial2	115	DBA1	LP	26.2783	2526.78	1376.97	47.3793	26.2288	1045.25	509.277	30.712	0	0	0.091	26.2783	2526.78	1376.97	78.0913	0	0	0.091
trial2	116	DBA1	CS	10.6881	1004.41	801.824	20.1452	10.6825	930.61	442.216	36.51	2	0.0545	0.072	10.6881	1004.41	801.824	56.6551	2	0.0545	0.072
trial2	116	DBA1	DB	7.66394	1241.88	650.144	19.6376	7.62957	1007.82	583.664	14.346	0	0	0.032	7.66394	1241.88	650.144	33.9837	0	0	0.032
trial2	116	DBA1	HP	12.3731	650.365	854.14	16.7734	12.3831	279.025	630.803	12.9552	0	0	0.0345	12.3731	650.365	854.14	29.7286	0	0	0.0345
trial2	116	DBA1	LP	6.88259	858.296	815.49	15.9587	7.21203	847.043	359.91	20.1413	3	0.0735	0.0175	7.19808	858.296	815.49	36.0999	3	0.0735	0.0175
trial2	117	DBA1	CS	4.09104	498.548	315.447	7.98063	4.15207	496.43	334.58	6.8877	0	0	0.026	4.09104	498.548	334.58	14.8683	0	0	0.026
trial2	117	DBA1	DB	7.86373	1101.58	698.175	18.004	7.85284	806.77	431.61	15.1971	0	0	0.044	7.86373	1101.58	698.175	33.2011	0	0	0.044
trial2	117	DBA1	HP	11.6391	725.698	796.849	25.6238	11.6427	372.232	255.974	13.4037	0	0	0.086	11.6391	725.698	796.849	39.0275	0	0	0.086
trial2	117	DBA1	LP	10.1748	2057.92	1360.37	12.5399	28.2021	2863.13	1525.36	121.144	4	0.0505	0.0795	28.2006	2863.13	1525.36	133.684	4	0.0505	0.0795
trial2	118	DBA1	CS	7.47525	1174.46	454.498	20.7334	7.54734	605.981	480.625	20.3206	0	0	0.104	7.47525	1174.46	480.625	41.054	0	0	0.104
trial2	118	DBA1	DB	6.52846	874.462	750.53	12.7209	6.51223	584.856	397.875	19.6624	3	0.0755	0.021	6.52846	874.462	750.53	32.3833	3	0.0755	0.021
trial2	118	DBA1	HP	18.6621	1647.64	1489.17	31.2099	18.7078	1909.2	1345.5	66.8792	2	0.022	0.048	18.6621	1909.2	1489.17	98.0891	2	0.022	0.048
trial2	118	DBA1	LP	12.132	805.552	1146.71	16.3723	12.1362	299.723	421.807	14.2431	0	0	0.0585	12.132	805.552	1146.71	30.6155	0	0	0.0585
trial2	119	DBA1	CS	4.81922	573.23	418.809	10.977	4.81855	655.566	548.965	9.81592	0	0	0.0245	4.81922	655.566	548.965	20.7929	0	0	0.0245
trial2	119	DBA1	DB	9.83618	948.202	597.569	17.7725	9.82907	693.02	422.569	13.5483	0	0	0.049	9.83618	948.202	597.569	31.3208	0	0	0.049
trial2	119	DBA1	HP	14.8848	1980.11	1033.05	39.9216	15.0437	1686.36	1146.95	64.767	2	0.0355	0.0355	14.8848	1980.11	1146.95	104.689	2	0.0355	0.0355
trial2	119	DBA1	LP	-41.6119	1743.98	1158.92	54.4525	-41.6119	3.5527136788005e-11	3.90798504668055e-11	0	0	0	0.0085	-33.0944	1743.98	1158.92	54.4525	0	0	0.0085
trial2	120	DBA1	CS	5.8734	746.901	439.686	12.2399	5.87358	453.535	281.198	11.0204	0	0	0.036	5.8734	746.901	439.686	23.2603	0	0	0.036
trial2	120	DBA1	DB	6.63302	1049.39	664.404	15.9862	6.6403	875.113	375.361	16.0091	0	0	0.0345	6.63302	1049.39	664.404	31.9953	0	0	0.0345
trial2	120	DBA1	HP	12.4724	1420.01	947.643	17.0526	19.3939	1922.73	1023.86	55.2535	2	0.0445	0.0155	19.3926	1922.73	1023.86	72.3061	2	0.0445	0.0155
trial2	120	DBA1	LP	11.0168	1661.47	1514.33	17.4964	11.0687	2285.48	794.515	49.1561	2	0.0265	0.0305	11.0168	2285.48	1514.33	66.6524	2	0.0265	0.0305
trial2	121	SJL	CS	5.56923	434.557	731.711	6.5403	12.2695	1982.19	1631.51	123.947	6	0.113	0.1815	12.2509	1982.19	1631.51	130.487	6	0.113	0.1815
trial2	121	SJL	DB	9.32468	700.033	869.671	14.9292	20.4624	1382.2	971.666	99.6822	2	0.0235	0.73	20.4566	1382.2	971.666	114.611	2	0.0235	0.73
trial2	121	SJL	HP	12.4936	857.811	2419.92	14.1298	12.7657	5281.12	3220.42	60.9167	2	0.015	0.0425	12.4936	5281.12	3220.42	75.0466	2	0.015	0.0425
trial2	121	SJL	LP	6.13129	276.092	640.159	6.38054	14.4709	2409.13	1723.58	168.431	5	0.0775	0.7965	14.4709	2409.13	1723.58	174.811	5	0.0775	0.7965
trial2	122	SJL	CS	7.80161	535.532	854.667	8.99966	7.79841	297.18	451.334	8.89631	0	0	0.0305	7.80161	535.532	854.667	17.896	0	0	0.0305
trial2	122	SJL	DB	12.7277	984.037	1046.56	17.3295	19.1367	1486.75	1109.61	83.2652	3	0.0735	0.3365	19.1154	1486.75	1109.61	100.595	3	0.0735	0.3365
trial2	123	SJL	CS	6.82466	563.632	650.237	13.2651	6.82231	549.545	398.964	11.965	0	0	0.0325	6.82466	563.632	650.237	25.2302	0	0	0.0325
trial2	123	SJL	DB	4.63347	529.718	385.7	7.33649	4.64605	542.612	323.296	9.24045	0	0	0.03	4.63347	542.612	385.7	16.5769	0	0	0.03
trial2	123	SJL	HP	22.4752	5161.23	4161.85	48.9038	22.4134	2329.92	2018.82	28.1334	0	0	0.0235	22.4752	5161.23	4161.85	77.0372	0	0	0.0235
trial2	123	SJL	LP	14.8565	986.352	1269.84	17.7931	14.9624	1189.5	1510.15	40.5195	0	0	0.2705	14.8565	1189.5	1510.15	58.3126	0	0	0.2705
trial2	124	SJL	CS	9.92656	472.552	1319.08	10.9973	9.97146	616.044	738.367	19.9935	0	0	0.048	9.92656	616.044	1319.08	30.9908	0	0	0.048
trial2	124	SJL	DB	95.4513	5044.59	7151.5	122.332	95.4751	3579.56	6344.68	128.903	0	0	0.042	95.4513	5044.59	7151.5	251.235	0	0	0.042
trial2	124	SJL	HP	9.10183	1490.52	2173.04	10.535	12.4415	3875.29	1689.3	33.7214	0	0	0.0335	12.4178	3875.29	2173.04	44.2563	0	0	0.0335
trial2	124	SJL	LP	13.2719	1996.95	1385.61	19.7542	24.7459	2739.95	1552.34	63.7595	2	0.0405	0.016	24.6927	2739.95	1552.34	83.5137	2	0.0405	0.016
trial2	125	SJL	CS	3.19233	317.873	254.219	6.16777	3.19518	475.35	437.798	6.62693	0	0	0.0285	3.19233	475.35	437.798	12.7947	0	0	0.0285
trial2	125	SJL	DB	67.0953	8397.57	7220.71	120.748	67.0718	6891.96	1668.42	226.729	2	0.033	0.0745	67.0953	8397.57	7220.71	347.476	2	0.033	0.0745
trial2	125	SJL	HP	14.9025	1778.41	2155.95	17.3625	17.6037	3985.49	3662.11	165.446	6	0.08	0.344	17.6037	3985.49	3662.11	182.809	6	0.08	0.344
trial2	125	SJL	LP	12.5489	1243.03	1309	17.7508	12.5682	376.385	962.125	18.5388	0	0	0.0565	12.5489	1243.03	1309	36.2896	0	0	0.0565
trial2	126	SJL	CS	5.38592	194.945	247.113	6.62935	5.38379	231.814	238.472	7.65764	0	0	0.0455	5.38592	231.814	247.113	14.287	0	0	0.0455
trial2	126	SJL	DB	3.19271	490.776	295.819	6.1002	3.18835	483.758	144.962	6.00087	0	0	0.0345	3.19271	490.776	295.819	12.1011	0	0	0.0345
trial2	126	SJL	HP	11.6681	682.454	1584.5	13.5863	11.6239	1143.41	2022.46	49.0883	0	0	0.4505	11.6681	1143.41	2022.46	62.6746	0	0	0.4505
trial2	126	SJL	LP	7.82981	641.063	397.877	15.5142	7.82338	312.491	168.539	20.3613	2	0.068	0.057	7.82981	641.063	397.877	35.8755	2	0.068	0.057
trial2	127	SJL	CS	42.8063	1850.97	2544.82	50.587	42.8521	2154.86	1270.16	106.062	0	0	0.2085	42.8063	2154.86	2544.82	156.649	0	0	0.2085
trial2	127	SJL	DB	5.20398	583.854	425.911	9.15853	5.20178	401.588	507.184	6.36668	0	0	0.027	5.20398	583.854	507.184	15.5252	0	0	0.027
trial2	127	SJL	HP	7.77541	851.064	792.827	9.45138	8.76436	692.611	1656.28	49.6286	2	0.0485	0.245	8.76436	851.064	1656.28	59.08	2	0.0485	0.245
trial2	127	SJL	LP	5.98575	360.11	641.087	7.58601	7.3288	781.128	666.205	24.9139	2	0.0175	0.056	7.3288	781.128	666.205	32.4999	2	0.0175	0.056
trial2	128	AKR	CS	4.06404	488.723	510.44	5.02439	4.21206	636.503	797.389	18.0159	0	0	0.048	4.06404	636.503	797.389	23.0402	0	0	0.048
trial2	128	AKR	DB	4.24181	595.8	288.261	11.358	4.24919	757.101	314.433	11.5036	0	0	0.026	4.24181	757.101	314.433	22.8616	0	0	0.026
trial2	128	AKR	HP	16.4535	1331.08	3576.29	19.8232	15.8041	4981.91	2167.93	83.6127	5	0.145	0.0885	16.4535	4981.91	3576.29	103.436	5	0.145	0.0885
trial2	128	AKR	LP	4.17281	179.955	714.383	4.33853	9.77063	1521.62	1073.83	39.4125	2	0.0375	0.03	9.76435	1521.62	1073.83	43.751	2	0.0375	0.03
trial2	129	AKR	CS	5.02935	205.048	335.689	5.2266	4.99312	387.349	379.732	6.10417	0	0	0.0245	5.02935	387.349	379.732	11.3308	0	0	0.0245
trial2	129	AKR	DB	1.15184	560.954	170.885	3.63678	3.65401	1264.45	433.849	22.9154	0	0	0.041	3.64063	1264.45	433.849	26.5521	0	0	0.041
trial2	129	AKR	HP	7.11665	3324.27	1159.14	19.2416	14.8808	3266.01	2057.52	53.3025	2	0.0215	0.0465	14.8703	3324.27	2057.52	72.5441	2	0.0215	0.0465
trial2	129	AKR	LP	9.91279	775.939	992.806	15.0504	9.90107	719.268	766.267	14.1849	0	0	0.028	9.91279	775.939	992.806	29.2353	0	0	0.028
trial2	130	AKR	CS	7.22025	535.255	1019.65	8.21987	12.9471	1000.43	1281.76	43.0355	2	0.018	0.042	12.9428	1000.43	1281.76	51.2554	2	0.018	0.042
trial2	130	AKR	DB	58.5733	4548.18	4078.38	103.024	58.6865	3938.62	2633.24	131.205	0	0	0.0635	58.5733	4548.18	4078.38	234.229	0	0	0.0635
trial2	130	AKR	HP	37.6511	5927.16	4677.02	61.0378	37.7456	3209.11	2451.02	54.6664	0	0	0.037	37.6511	5927.16	4677.02	115.704	0	0	0.037
trial2	130	AKR	LP	3.94187	1134.71	464.443	8.41146	8.84305	1116.71	1020.13	29.0442	3	0.0645	0.0185	8.84305	1134.71	1020.13	37.4556	3	0.0645	0.0185
trial2	131	AKR	CS	8.04169	786.088	822.14	11.7895	8.00596	547.444	844.181	9.13315	0	0	0.0235	8.04169	786.088	844.181	20.9226	0	0	0.0235
trial2	131	AKR	DB	13.2328	1307.43	1410.52	20.621	13.1925	1155.4	779.681	19.7726	0	0	0.029	13.2328	1307.43	1410.52	40.3936	0	0	0.029
trial2	131	AKR	LP	20.4207	1482.07	1430.18	28.5648	20.3416	1682.45	975.086	69.2912	3	0.0465	0.0615	20.4207	1682.45	1430.18	97.856	3	0.0465	0.0615
trial2	132	AKR	CS	6.16507	476.77	429.676	9.27752	6.15595	500.948	245.472	11.7244	0	0	0.0495	6.16507	500.948	429.676	21.0019	0	0	0.0495
trial2	132	AKR	DB	7.94215	478.846	451.296	11.305	7.93658	489.981	417.979	11.1936	0	0	0.0345	7.94215	489.981	451.296	22.4986	0	0	0.0345
trial2	132	AKR	HP	19.0353	5320.63	2885.01	34.0413	22.8516	6199.31	1936.86	69.812	2	0.024	0.0115	22.3186	6199.31	2885.01	103.853	2	0.024	0.0115
trial2	132	AKR	LP	8.14988	857.866	1037.72	10.3366	18.5531	1550.23	1838.46	106.889	3	0.0435	0.1395	18.5531	1550.23	1838.46	117.225	3	0.0435	0.1395
trial2	133	AKR	CS	4.95412	609.275	380.42	9.60596	4.95103	546.859	255.973	9.30685	0	0	0.044	4.95412	609.275	380.42	18.9128	0	0	0.044
trial2	133	AKR	DB	75.9596	9934.13	6863.25	162.046	76.0671	9881.1	4869.71	160.683	0	0	0.03	75.9596	9934.13	6863.25	322.728	0	0	0.03
trial2	133	AKR	HP	309.786	48840.2	52803.9	452.802	308.903	34569.1	40461	471.382	0	0	0.0295	309.786	48840.2	52803.9	924.184	0	0	0.0295
trial2	133	AKR	LP	9.62407	917.584	836.286	13.9895	9.62346	678.605	679.899	10.7629	0	0	0.0265	9.62407	917.584	836.286	24.7524	0	0	0.0265
trial2	134	AKR	CS	12.6882	775.959	1042.56	15.3584	12.6555	176.684	538.923	12.2541	0	0	0.0445	12.6882	775.959	1042.56	27.6125	0	0	0.0445
trial2	134	AKR	DB	6.74562	584.126	1060.32	8.59358	6.73321	96.4367	429.4	5.11152	0	0	0.0255	6.74562	584.126	1060.32	13.7051	0	0	0.0255
trial2	134	AKR	HP	20.63	5211.59	3067.93	61.9141	20.4015	4403.36	1824.84	33.4657	0	0	0.0245	20.63	5211.59	3067.93	95.3798	0	0	0.0245
trial2	134	AKR	LP	102.652	20809.7	14885.4	139.908	245.099	26891.3	17729.3	713.408	2	0.05	0.017	244.09	26891.3	17729.3	853.315	2	0.05	0.017
trial2	135	AKR	CS	8.63061	891.351	1086.37	12.7273	10.5201	567.668	1646.83	32.6493	0	0	0.073	10.5083	891.351	1646.83	45.3765	0	0	0.073
trial2	135	AKR	DB	7.3453	650.77	438.212	13.0299	7.38971	357.721	650.364	6.9922	0	0	0.0225	7.3453	650.77	650.364	20.0221	0	0	0.0225
trial2	135	AKR	HP	5.4348	2738.79	1320.97	17.5746	9.32386	2185.37	2563.57	39.3079	2	0.0245	0.0365	9.32328	2738.79	2563.57	56.8825	2	0.0245	0.0365
trial2	135	AKR	LP	94.5286	10126.2	8090.43	151.95	94.3181	6599.42	7324.49	120.639	0	0	0.028	94.5286	10126.2	8090.43	272.588	0	0	0.028
trial2	136	AKR	CS	4.88851	919.737	669.602	8.46541	6.59955	1412.04	1162.66	23.4099	0	0	0.0605	6.59955	1412.04	1162.66	31.8753	0	0	0.0605
trial2	136	AKR	DB	6.22204	733.124	873.064	10.3745	6.23598	619.763	846.435	8.2902	0	0	0.023	6.22204	733.124	873.064	18.6647	0	0	0.023
trial2	136	AKR	HP	37.6484	4148.77	4190.28	53.7376	37.3205	3460.55	3251.18	52.4796	0	0	0.0265	37.6484	4148.77	4190.28	106.217	0	0	0.0265
trial2	136	AKR	LP	6.5248	1497.39	669.427	13.6765	11.5443	3036.6	1498.86	69.6538	2	0.0375	0.029	11.5302	3036.6	1498.86	83.3303	2	0.0375	0.029
trial2	137	AKR	CS	13.3102	1039.55	1556.7	16.5654	13.3056	696.589	1076.54	15.5128	0	0	0.0255	13.3102	1039.55	1556.7	32.0782	0	0	0.0255
trial2	137	AKR	DB	7.3769	326.695	368.546	9.5958	7.36144	308.165	247.738	8.33389	0	0	0.051	7.3769	326.695	368.546	17.9297	0	0	0.051
trial2	137	AKR	HP	7.2413	3743.22	1992.71	15.5243	23.6151	6865.52	4696.92	93.9326	2	0.0325	0.0125	23.3714	6865.52	4696.92	109.457	2	0.0325	0.0125
trial2	137	AKR	LP	8.60172	1403.27	869.601	20.6909	16.3993	1128.54	1490.31	50.9617	0	0	0.064	16.3993	1403.27	1490.31	71.6526	0	0	0.064

## Sheet: pre CFA
id	strain	stimulus	reflexive.max.height	reflexive.max.x.velocity	reflexive.max.y.velocity	reflexive.distance.traveled	reflexive.score	reflexive.predicted	reflexive.actual	affective.max.height	affective.max.x.velocity	affective.max.y.velocity	affective.distance.traveled	affective.number.of.shakes	affective.shaking.duration	affective.guarding.duration	affective.score	affective.predicted	affective.actual
922	129	4G	4.54439	597.26	444.219	8.21695	-0.297476	NP	P	4.5493	727.704	389.524	30.5683	2	0.0485	0.2265	0.000304459	P	P
922	129	DB	6.22357	1280.72	517.587	20.6699	0.843645	P	NP	6.22033	914.789	386.838	19.231	0	0	0.044	-0.254449	NP	NP
923	129	4G	2.48576	32.6477	58.8447	2.96783	-1.07491	NP	P	6.70263	447.08	373.809	20.1287	0	0	0.0975	-0.193406	NP	P
923	129	DB	46.3103	4420.61	4344.18	79.6058	11.7977	P	NP	46.3555	4156.22	4708.74	128.956	0	0	0.052	10.4302	P	NP
925	129	4G	3.34251	260.222	151.79	6.92082	-0.6587	NP	P	8.75619	624.868	427.522	115.035	0	0	0.649	-0.689953	NP	P
925	129	DB	9.33226	431.636	974.416	12.9284	0.696367	P	NP	9.33039	260.174	395.987	11.8592	0	0	0.1595	0.615275	P	NP
926	129	4G	5.35719	574.424	323.091	18.0954	0.338609	P	P	5.43328	581.503	543.213	10.6756	0	0	0.031	-0.280077	NP	P
926	129	DB	6.2686	599.703	470.61	17.2465	0.457388	P	NP	6.27366	297.787	473.275	16.9665	0	0	0.0445	-0.268361	NP	NP
927	129	4G	6.73493	228.031	234.398	24.1904	0.784584	P	P	9.31544	689.484	860.7	96.7939	2	0.0285	0.479	0.354048	P	P
927	129	DB	3.65897	401.06	401.862	11.3264	-0.383613	NP	NP	3.76648	346.141	278.8	25.9431	0	0	0.157	-0.997766	NP	NP
930	129	4G	6.86814	431.259	436.244	9.85671	0.170467	P	P	8.53261	559.657	434.741	17.8791	0	0	0.0545	0.288126	P	P
930	129	DB	5.83186	783.366	413.543	13.8399	0.287549	P	NP	5.88865	615.292	355.094	12.2138	0	0	0.0435	-0.286523	NP	NP
931	BalbC	4G	13.3692	829.031	1548.27	15.9261	0.0186859	P	P	13.4187	1764.61	1353.06	100.719	7	0.1485	0.2575	0.908541	P	P
931	BalbC	DB	12.8055	553.828	1675.69	15.1672	-0.105427	NP	NP	12.8133	788.599	571.27	20.4886	0	0	0.1555	-0.190156	NP	NP
934	BalbC	4G	4.37207	930.236	290.335	13.8248	-0.854193	NP	P	4.42428	548.181	378.648	9.02123	0	0	0.029	-1.2426	NP	P
934	BalbC	DB	9.18274	487.384	887.501	10.7085	-0.511587	NP	NP	9.23427	1308.2	946.358	37.1162	3	0.0495	0.021	-0.154723	NP	NP
935	BalbC	4G	11.7139	1336.23	904.241	22.0839	0.0971814	P	P	11.783	970.279	1107.6	42.1109	3	0.044	0.071	0.1357	P	P
935	BalbC	DB	10.3151	1440.83	785.774	22.5736	-0.0201469	NP	NP	10.4055	1157.9	640.684	19.2102	2	0.0275	0.035	-0.195734	NP	NP
936	BalbC	4G	19.0504	560.933	813.621	24.8676	0.87776	P	P	19.0433	402.812	606.687	20.4313	0	0	0.053	0.448814	P	P
936	BalbC	DB	10.8132	491.382	674.027	17.4486	-0.169326	NP	NP	10.8383	454.743	362.558	17.6861	0	0	0.063	-0.561564	NP	NP
938	BalbC	4G	13.5764	101.527	402.897	14.5704	0.0594913	P	P	13.5566	197.963	195.116	17.944	0	0	0.159	-0.30302	NP	P
938	BalbC	DB	10.1138	349.113	733.987	11.5621	-0.390639	NP	NP	10.1122	130.258	119.053	13.1892	0	0	0.4785	-0.561821	NP	NP
939	BalbC	4G	11.1326	686.699	506.665	19.1027	-0.0583062	NP	P	11.1567	423.426	236.655	17.2199	0	0	0.143	-0.539252	NP	P
939	BalbC	DB	15.8094	831.15	1403.14	23.5804	0.460418	P	NP	15.7947	355.068	349.003	18.3481	0	0	0.1255	0.0145683	P	NP
941	AJ	4G	10.4927	573.734	684.629	14.077	0.396408	P	P	14.6119	1746.94	1198.96	74.3358	3	0.08	0.0375	1.45532	P	P
941	AJ	DB	13.0803	1301.43	1293.17	19.2785	0.991289	P	NP	13.0724	471.592	668.615	14.9969	0	0	0.236	0.600177	P	NP
943	AJ	4G	8.08499	727.128	617.452	15.1309	0.0771452	P	P	8.06923	266.434	152.778	12.861	0	0	0.131	-0.41594	NP	P
943	AJ	DB	2.982	749.927	240.122	16.4783	-0.631053	NP	NP	3.04357	260.768	178.432	6.73424	0	0	0.0575	-1.10909	NP	NP
944	AJ	4G	10.4415	891.358	1071.3	15.8206	0.428638	P	P	10.4376	1651.33	1289.32	55.0169	2	0.0465	0.0425	0.690454	P	P
944	AJ	DB	9.03437	592.256	923.118	12.0314	0.053492	P	NP	11.9257	698.87	1059.84	43.9301	5	0.065	0.0215	1.39716	P	NP
947	AJ	4G	12.0838	461.72	596.693	24.2503	1.01845	P	P	13.2988	1439.75	867.018	64.0264	3	0.075	0.1125	1.25733	P	P
947	AJ	DB	5.54268	1124.96	763.098	14.2179	-0.338465	NP	NP	5.53033	837.012	610.675	9.66466	0	0	0.026	-0.602388	NP	NP
948	AJ	4G	3.5758	141.939	207.276	16.7402	-0.59466	NP	P	8.17277	1557.08	1404.05	127.112	8	0.0715	0.4505	1.34517	P	P
949	AJ	4G	6.61009	725.987	497.434	9.99473	-0.325806	NP	P	13.2823	1565.67	1084.48	82.9285	4	0.0845	0.1405	1.44172	P	P
957	C57B6-	4G	12.7696	1191.4	1623.4	16.5859	0.340706	P	P	14.3299	2046.98	1346.48	50.9793	2	0.034	0.0235	0.642113	P	P
957	C57B6-	DB	11.8423	1076.88	1096.91	14.7544	0.215283	P	NP	11.8415	445.588	1036.43	15.2401	0	0	0.048	0.0369137	P	NP
959	C57B6-	4G	8.01422	510.185	723.059	10.8118	-0.340072	NP	P	8.01076	433.857	580.027	9.23236	0	0	0.039	-0.584004	NP	P
959	C57B6-	DB	8.46933	661.745	750.789	12.2905	-0.246364	NP	NP	8.46636	432.315	327.851	11.5428	0	0	0.066	-0.556009	NP	NP
960	C57B6-	4G	5.88997	145.458	462.86	6.50698	-0.693891	NP	P	7.4295	279.223	840.032	25.3499	3	0.0455	0.0505	0.0412831	P	P
960	C57B6-	DB	4.10569	478.602	465.924	6.94852	-0.88111	NP	NP	4.15553	490.303	264.889	9.36538	2	0.025	0.016	-0.770927	NP	NP
961	C57B6-	4G	4.31162	326.433	160.507	9.32037	-0.794113	NP	P	4.32431	311.424	536.137	9.68025	2	0.0315	0.029	-0.599114	NP	P
961	C57B6-	DB	7.8531	407.048	783.629	9.38503	-0.400012	NP	NP	7.8652	292.722	600.556	8.81247	0	0	0.0325	-0.61522	NP	NP
962	C57B6-	4G	4.29527	682.053	506.665	7.02737	-0.847849	NP	P	4.24905	722.946	337.937	10.3183	0	0	0.0255	-1.22738	NP	P
962	C57B6-	DB	5.74059	936.983	522.856	12.8472	-0.5338	NP	NP	5.72166	736.322	298.884	17.0088	0	0	0.0585	-1.0398	NP	NP
964	C57B6-	4G	4.55956	371.413	487.882	9.97214	-0.767789	NP	P	5.75916	334.05	320.438	18.8882	0	0	0.116	-0.956454	NP	P
964	C57B6-	DB	19.4473	724.547	2114.11	20.8924	1.18319	P	NP	19.4949	1791.8	724.427	73.5847	3	0.0795	0.1205	1.71732	P	NP

## Sheet: post CFA
id	strain	stimulus	reflexive.max.height	reflexive.max.x.velocity	reflexive.max.y.velocity	reflexive.distance.traveled	reflexive.score	reflexive.predicted	reflexive.actual	affective.max.height	affective.max.x.velocity	affective.max.y.velocity	affective.distance.traveled	affective.number.of.shakes	affective.shaking.duration	affective.guarding.duration	affective.score	affective.predicted	affective.actual
922	129	4G	6.90314	625.882	751.179	10.8289	0.23695	P	P	6.91201	602.138	488.026	12.4925	0	0	0.031	0.0108055	P	P
922	129	DB	8.65941	1200.45	601.078	15.0548	1.00517	P	NP	8.64279	1208.19	726.636	15.7979	0	0	0.0265	0.608081	P	NP
923	129	4G	10.2102	297.917	636.024	14.6207	0.957387	P	P	10.401	321.041	328.029	57.4844	0	0	0.2825	0.185667	P	P
923	129	DB	6.40101	423.658	513.544	9.92819	0.0675312	P	NP	6.39617	387.376	538.635	9.71562	0	0	0.0295	-0.0762381	NP	NP
925	129	4G	5.9575	278.225	193.489	8.34538	-0.0881895	NP	P	5.95748	29.6181	81.8715	6.17547	0	0	0.2015	-0.262065	NP	P
925	129	DB	2.8387	238.653	288.088	6.65137	-0.800095	NP	NP	2.83588	238.337	157.78	9.92528	0	0	0.0555	-1.13964	NP	NP
926	129	4G	3.92509	381.636	340.737	10.8662	-0.350201	NP	P	3.92631	389.561	278.114	8.39641	0	0	0.034	-0.781325	NP	P
927	129	4G	7.91086	575.61	608.1	10.9106	0.442345	P	P	7.92486	600.246	330.652	17.0172	0	0	0.0635	0.117047	P	P
927	129	DB	3.59749	662.962	430.787	6.83539	-0.519593	NP	NP	3.56669	501.773	432.248	6.4427	0	0	0.0235	-0.734974	NP	NP
930	129	4G	9.24235	479.174	203.305	42.247	2.21482	P	P	9.10269	183.036	293.59	22.1484	0	0	0.1085	0.256197	P	P
930	129	DB	2.35294	348.072	227.805	4.56634	-0.942784	NP	NP	2.36488	489.563	226.178	7.30386	0	0	0.0295	-1.14767	NP	NP
931	BalbC	4G	4.84169	1472.93	678.198	15.0473	-0.758528	NP	P	12.1509	1472.93	1471.49	131.734	6	0.08	0.337	0.303401	P	P
931	BalbC	DB	5.67556	824.43	640.841	10.3372	-0.835722	NP	NP	7.36864	583.816	559.648	23.0108	2	0.029	0.129	-0.61608	NP	NP
935	BalbC	DB	7.45921	342.39	334.238	9.71819	-0.674381	NP	NP	7.4501	348.398	384.548	10.6529	0	0	0.0375	-0.921885	NP	NP
938	BalbC	4G	10.3601	210.886	580.982	11.5876	-0.361787	NP	P	10.3631	159.835	356.383	12.7851	0	0	0.0855	-0.611492	NP	P
938	BalbC	DB	7.64165	194.854	279.145	9.50903	-0.66965	NP	NP	7.64159	156.591	473.02	38.9937	4	0.1295	0.7165	0.0101221	P	NP
939	BalbC	4G	7.52059	332.588	562.92	8.45237	-0.721039	NP	P	7.49777	519.374	595.709	33.6395	3	0.0405	0.073	-0.568676	NP	P
939	BalbC	DB	9.86002	476.237	728.783	13.613	-0.36074	NP	NP	9.88128	268.184	300.755	22.9455	0	0	0.332	-0.627099	NP	NP
941	AJ	4G	14.5945	1406.18	1883.09	16.2536	1.04525	P	P	18.7244	2272.17	1531.94	243.226	10	0.145	0.683	2.94528	P	P
941	AJ	DB	4.61843	690.469	481.634	7.15616	-0.749434	NP	NP	20.7903	2732.95	2157.12	158.255	7	0.105	0.3235	3.13689	P	NP
943	AJ	4G	9.68713	696.261	1102.73	11.763	0.132907	P	P	11.3147	1582.47	1139.61	79.0682	3	0.074	0.8655	1.86858	P	P
943	AJ	DB	9.70316	546.131	884.63	11.8195	0.153639	P	NP	9.94219	1308.93	1026.29	38.8094	3	0.071	0.0545	1.00414	P	NP
944	AJ	4G	8.097	426.767	551.074	11.7124	-0.0699424	NP	P	8.10872	321.388	242.327	12.5412	0	0	0.1435	-0.349204	NP	P
944	AJ	DB	4.87236	318.731	159.427	9.962	-0.601915	NP	NP	4.87067	78.979	126.665	5.61581	0	0	0.071	-0.876077	NP	NP
947	AJ	4G	-7.21593	51.4763	87.4792	2.87636	-2.81774	NP	P	-5.65	5226.65	4176.51	135.329	2	0.0275	0.029	-0.848404	NP	P
947	AJ	DB	5.58698	820.384	394.611	12.3259	-0.378425	NP	NP	5.56283	1154.14	575.521	12.4635	0	0	0.0225	-0.614168	NP	NP
948	AJ	4G	8.20189	288.311	143.149	13.2256	0.0487569	P	P	8.41203	761.132	414.901	25.1037	2	0.0575	0.066	0.368622	P	P
948	AJ	DB	9.87527	736.143	929.009	14.4921	0.293522	P	NP	9.90648	1305.21	599.494	34.0545	2	0.0265	0.0495	0.340898	P	NP
957	C57B6-	4G	10.0296	1109.8	581.999	23.2095	0.214742	P	P	10.0433	581.209	359.77	26.0708	0	0	0.0765	-0.476991	NP	P
957	C57B6-	DB	3.81173	780.541	484.926	9.52435	-0.844932	NP	NP	3.80322	548.262	520.609	11.2869	0	0	0.0285	-1.26228	NP	NP
959	C57B6-	4G	2.98505	195.707	72.167	14.087	-0.851843	NP	P	8.15832	798.338	895.266	61.7949	6	0.09	0.2915	1.03429	P	P
959	C57B6-	DB	4.91284	363.165	461.15	7.22925	-0.783794	NP	NP	6.90816	605.893	551.494	31.4378	5	0.118	0.1065	0.923323	P	NP
960	C57B6-	4G	14.1026	961.025	1228.85	17.9097	0.541883	P	P	14.9465	764.041	687.642	55.3633	0	0	0.0955	-0.00701707	NP	P
960	C57B6-	DB	5.35339	381.836	725.488	8.01539	-0.728885	NP	NP	5.36977	545.257	461.275	21.9891	0	0	0.0635	-1.1154	NP	NP
961	C57B6-	4G	11.0802	745.398	344.324	20.9118	0.285874	P	P	11.0909	890.095	423.572	21.3041	0	0	0.057	-0.267842	NP	P
961	C57B6-	DB	6.51998	572.546	856.025	9.6929	-0.549303	NP	NP	6.4741	622.86	376.998	12.4365	0	0	0.0395	-0.893578	NP	NP
962	C57B6-	4G	5.23667	628.058	420.318	8.65505	-0.696573	NP	P	5.2117	776.196	725.726	8.38457	0	0	0.0225	-0.965063	NP	P
962	C57B6-	DB	8.73534	536.755	874.084	11.8906	-0.237536	NP	NP	8.63152	509.53	1068.75	15.8177	0	0	0.038	-0.453115	NP	NP
964	C57B6-	4G	10.0789	337.083	1523.42	11.3212	-0.139179	NP	P	10.0495	832.754	689.108	36.7882	3	0.052	0.0875	0.407852	P	P
964	C57B6-	DB	3.43662	201.316	353.943	4.69218	-1.01927	NP	NP	3.42634	101.394	104.77	7.88433	2	0.011	0.1	-0.887358	NP	NP
