# Supplementary figures and images for: A machine-vision approach for automated pain measurement at millisecond timescales
Source: eLife journal article supplement (doi:10.7554/elife.57258), 2020-08-06

A

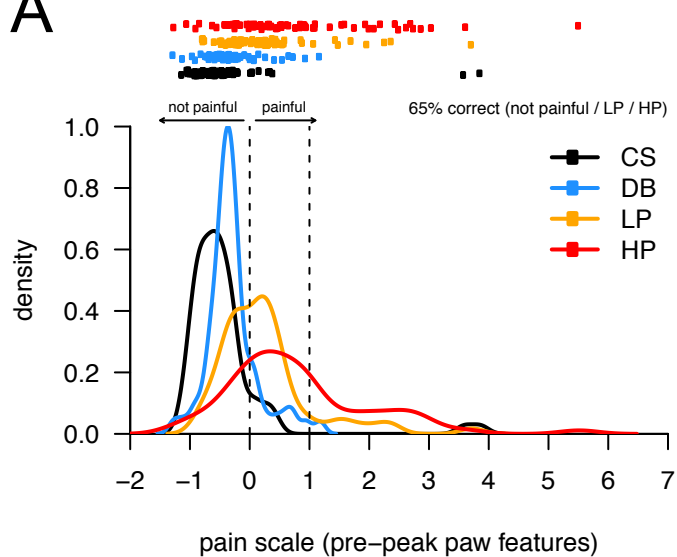

B

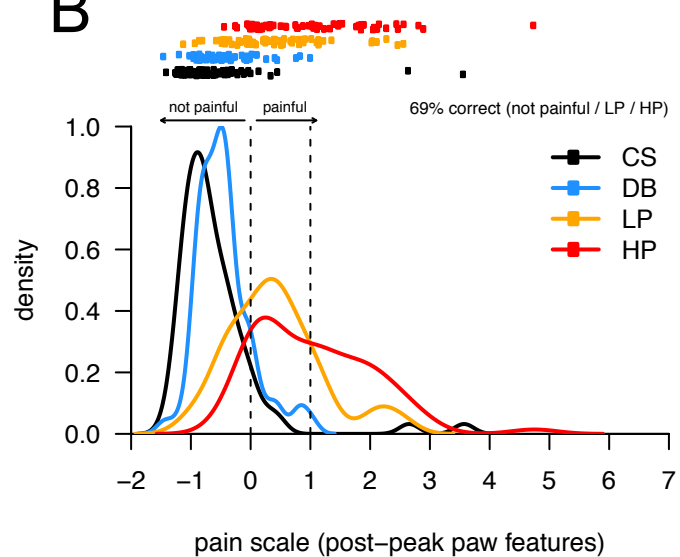

Supplement: supp [file elife-57258-supp-v1.zip]

A

## pre-peak paw features

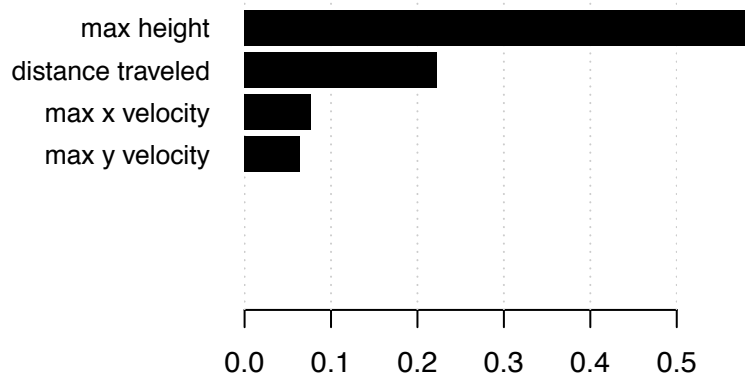

B

## post-peak paw features

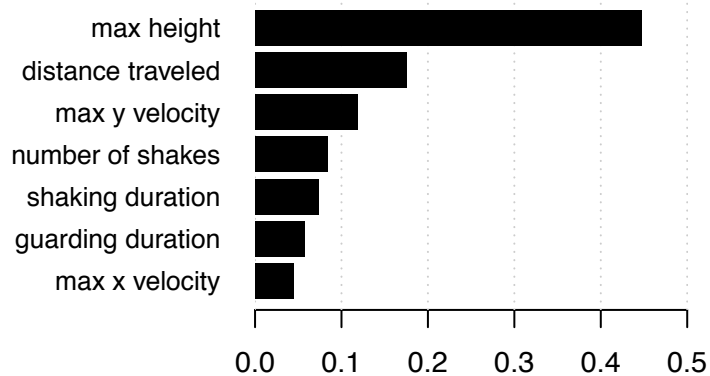

feature importance

Supplement: supp [file elife-57258-supp-v1.zip]

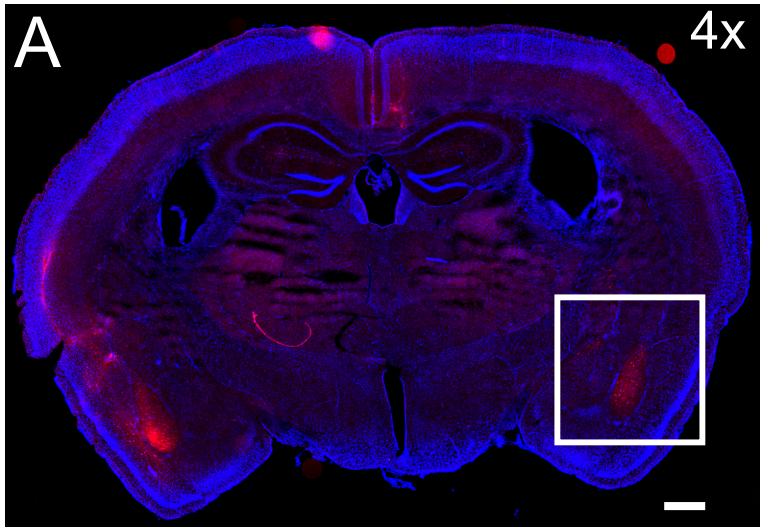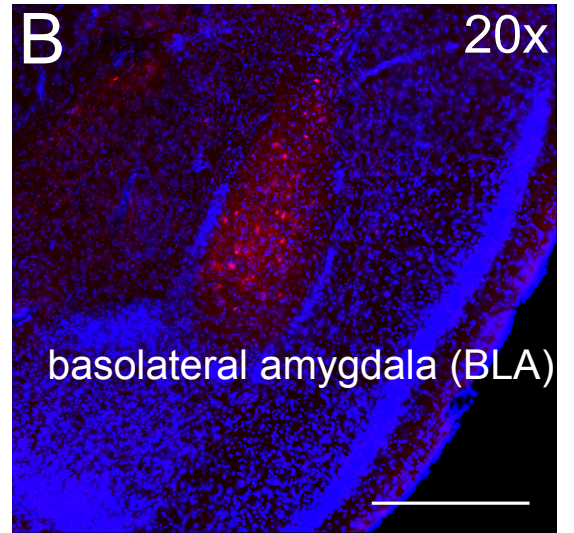

Supplement: supp [file elife-57258-supp-v1.zip]

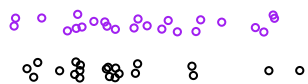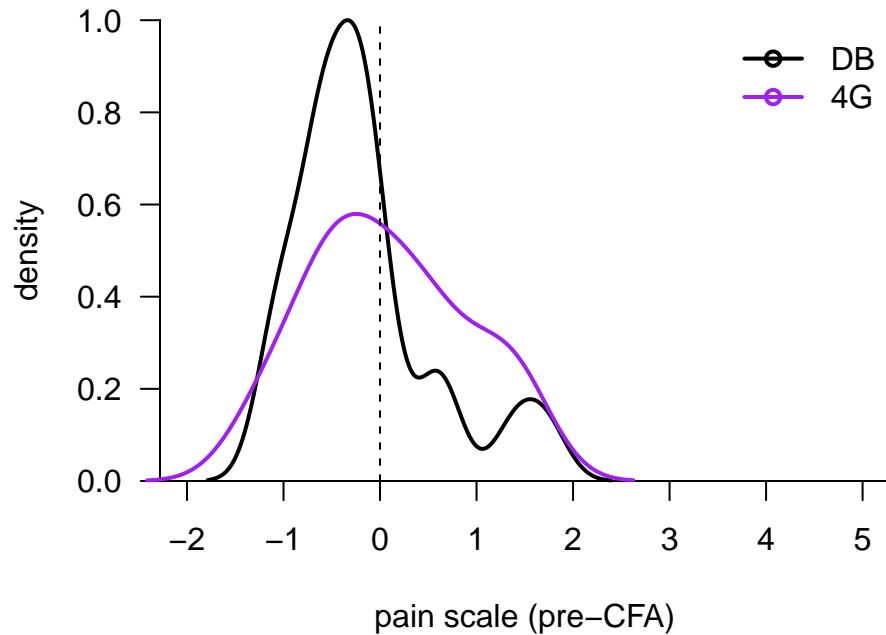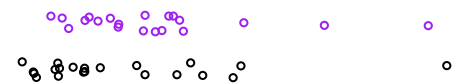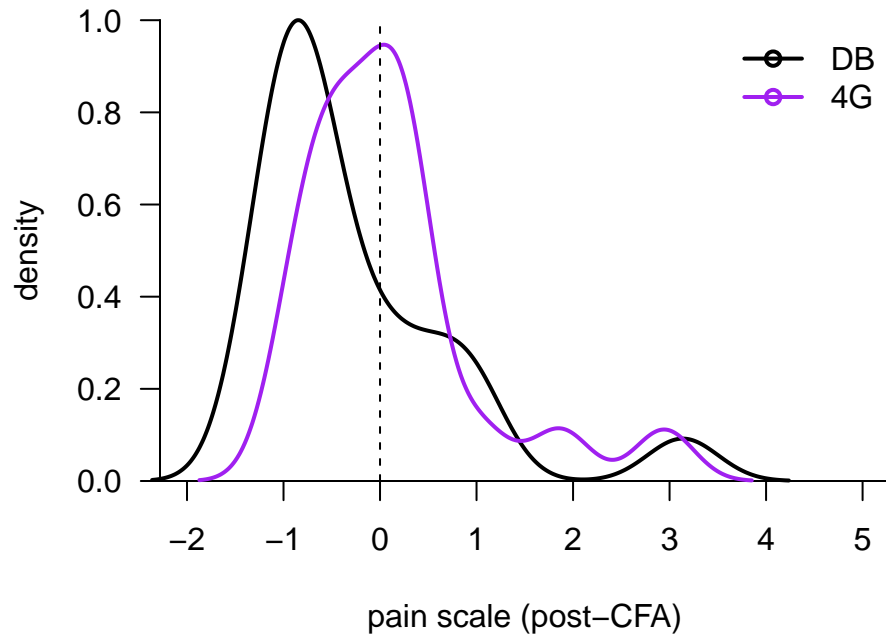

Supplement: supp [file elife-57258-supp-v1.zip]
